# Supplementary material for: FACT and Ubp10 collaborate to modulate H2B deubiquitination and nucleosome dynamics
Source: eLife journal article supplement (doi:10.7554/elife.40988), 2019-01-25
Supplement: supp [file elife-40988-supp-v1.zip]

Archive with 10 entries (10 files):
- elife_poa_e40988_Figure_2_figure_supplement_4.ai
- elife_poa_e40988_Transparent_Reporting_File.pdf
- elife_poa_e40988_Figure_2_figure_supplement_2.ai
- elife_poa_e40988_Figure_3_figure_supplement_4.ai
- elife_poa_e40988_Figure_3_figure_supplement_2.ai
- elife_poa_e40988_Figure_2_figure_supplement_1.ai
- elife_poa_e40988_Figure_6_figure_supplement_6.ai
- elife_poa_e40988_Figure_3_figure_supplement_1.ai
- elife_poa_e40988_Figure_2_figure_supplement_3.ai
- elife_poa_e40988_Figure_3_figure_supplement_3.ai
